# Supplementary material for: PEDOT:PSS Nanofilms Fabricated by a Nonconventional Coating Method for Uses as Transparent Conducting Electrodes in Flexible Electrochromic Devices
Source: Hindawi journal article supplement (doi:10.1155/2017/5176481), 2017-01-01
Supplement: f1 [file 5176481.f1.pdf]

# PEDOT:PSS Nanofilms Fabricated by a Nonconventional Coating Method for Uses as Transparent Conducting Electrodes in Flexible Electrochromic Devices

Kanyanee Sanglee, Surawut Chuangchote\*, Pipat Chaiwiwatworakul, Pisist Kumnorkaew

## Supporting Information

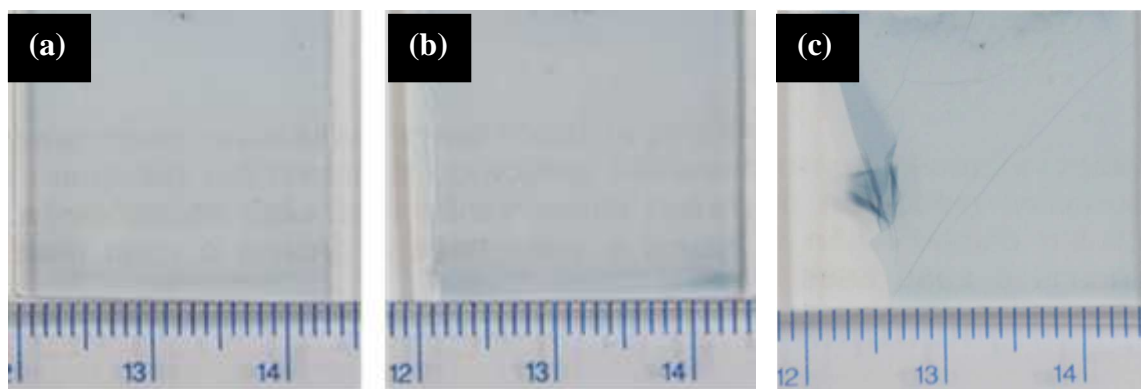

**Fig. S1** Photo images of PEDOT:PSS films coated on glasses: (a) pristine, (b) methanesulfonic acid ( $\text{CH}_3\text{SO}_3\text{H}$ )-treated, and (c) sulfuric acid ( $\text{H}_2\text{SO}_4$ )-treated films.

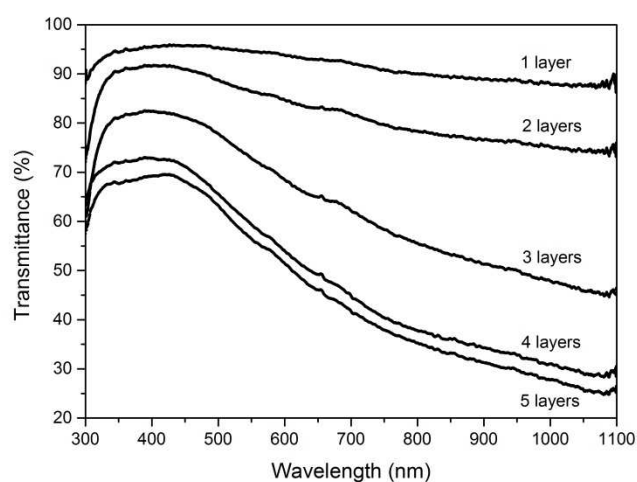

**Fig. S2** Transmittance spectra of PEDOT:PSS films at different numbers of film layers.
